# Supplementary material
Source: PubMed Central journal article supplement (PMC3974909)
Supplement: NIHMS460341-supplement-02.pdf [file NIHMS460341-supplement-02.pdf]

**Supplementary Table S1. ChIP and FAIRE sequencing statistics, Related to Figures 1 and 2.**

| Library             | raw reads  |     | total aligned |    | total non-aligned |    | aligned to multiple places |    | unique alignments |    | PCR duplicates |    |
|---------------------|------------|-----|---------------|----|-------------------|----|----------------------------|----|-------------------|----|----------------|----|
|                     | reads      | %   | reads         | %  | reads             | %  | reads                      | %  | reads             | %  | reads          | %  |
| <b>HIRA ChIP</b>    | 27,524,520 | 100 | 19,959,130    | 73 | 7,565,390         | 27 | 2,088,010                  | 8  | 10,565,008        | 38 | 7,306,112      | 27 |
| <b>UBN1 ChIP</b>    | 34,344,609 | 100 | 32,462,304    | 95 | 1,882,305         | 5  | 3,329,300                  | 10 | 22,305,171        | 65 | 6,827,833      | 20 |
| <b>ASF1a ChIP</b>   | 32,183,402 | 100 | 28,649,667    | 89 | 3,533,735         | 11 | 3,052,060                  | 9  | 19,452,448        | 60 | 6,145,159      | 19 |
| <b>input</b>        | 34,217,500 | 100 | 32,683,344    | 96 | 1,534,156         | 4  | 3,561,466                  | 10 | 26,424,527        | 77 | 2,697,351      | 8  |
| <b>HA-H3.3 ChIP</b> | 35,698,648 | 100 | 31,252,271    | 88 | 4,446,377         | 12 | 3,004,809                  | 8  | 24,279,974        | 68 | 3,967,488      | 11 |
| <b>FAIRE</b>        | 35,762,737 | 100 | 25,623,173    | 72 | 10,139,564        | 28 | 4,468,770                  | 12 | 18,098,502        | 51 | 3,055,901      | 9  |
| <b>input</b>        | 37,319,035 | 100 | 33,905,676    | 91 | 3,413,359         | 9  | 4,237,570                  | 11 | 28,758,882        | 77 | 909,224        | 2  |

**Supplementary Table S2. Genomic locations probed by ChIP-PCR and corresponding primer sequences, Related to Figures 1, 2, S2.**

|    | Related to figure       | Genomic location (hg18)      | Size  | Forward primer sequence (primer ID) | Reverse primer sequence (primer ID) |
|----|-------------------------|------------------------------|-------|-------------------------------------|-------------------------------------|
| 1  | Fig 1B, -10kb region    | chr20 : 46234383 - 46234494  | 112bp | CGTGTGACTTTTGCTTCTCG (1257)         | TCAGACATTGCACCAAGCTC (1258)         |
| 2  | Fig 1B, -5kb region     | chr20 : 46238499 - 46238594  | 96bp  | TGCCTTCTCTTGCAGTGTG (1259)          | GCCGACTTTGACATTTACCG (1260)         |
| 3  | Fig 1B, -2kb region     | chr20 : 46241060 - 46241145  | 86bp  | TGAAGCTCTTGCCATGTGTC (1263)         | CTGAATAAAGGGGACTGAGTGG (1264)       |
| 4  | Fig 1B, 0kb region      | chr20 : 46242773 - 46242889  | 117bp | TGAACAATGAGGCCACCATA (1128)         | AAATTTCCACTGTGCTTCAACA (1132)       |
| 5  | Fig 1B, +1kb region     | chr20 : 46243817 - 46243898  | 82bp  | AGGCCGATACCTGAGAATTG (1267)         | TCCCATGACCACAGTGATTG (1268)         |
| 6  | Fig 1B, +5kb region     | chr20 : 46247073 - 46247166  | 94bp  | GCCAAAAATGGACCTCAGTG (1273)         | AAGGAGCACGAACGCTTATC (1274)         |
| 7  | Fig 1B, +10kb region    | chr20 : 46253138 - 46253240  | 103bp | GCAACGAGAACAATGAGGAAG (1275)        | TGCCATGGGAGAAGTTAAGC (1276)         |
| 8  | Fig 1C                  | chr20 : 46242773 - 46242889  | 117bp | TGAACAATGAGGCCACCATA (1128)         | AAATTTCCACTGTGCTTCAACA (1132)       |
| 9  | Fig S1A                 | chr20 : 46242773 - 46242889  | 117bp | TGAACAATGAGGCCACCATA (1128)         | AAATTTCCACTGTGCTTCAACA (1132)       |
| 10 | Fig 1E, top left        | chr9 : 132711743 - 132711936 | 194bp | CTGAACCGTCTCCAAGAACC (1067)         | CCCAGTACCGGCTACTTCAC (1068)         |
| 11 | Fig 1E, top centre      | chr11 : 47836056 - 47836221  | 166bp | CTCATTTTGCCTGCCAAGTT (1069)         | GAAAAGCATTGGCCTCTGAC (1070)         |
| 12 | Fig 1E, top right       | chr20 : 46242773 - 46242999  | 227bp | TGAACAATGAGGCCACCATA (1071)         | CGCCAATCCAAATTTTTCTG (1072)         |
| 13 | Fig 1E, middle left     | chr9 : 112340732 - 112340931 | 200bp | ATAGCTGGAGCTTTGGCTCA (1075)         | AGCAGTTGCAGCTGTTCTGA (1076)         |
| 14 | Fig 1E, middle centre   | chr1 : 78071247 - 78071411   | 165bp | TGGCAGAGCATAGGAAAAGC (1077)         | TGGGGCTGACATTTGATGTA (1078)         |
| 15 | Fig 1E, middle right    | chr9 : 129376242 - 129376399 | 158bp | TCCCTTTTCTTGGCTCAGG (1079)          | CAGGACCTGTAGGTGGCATT (1080)         |
| 16 | Fig 1E, bottom left     | chr10 : 30752037 - 30752199  | 163bp | AGTGTGGCCTGGAAGACTG (1183)          | GCTGAGGAAGTTCTGGATGG (1184)         |
| 17 | Fig 1E, bottom centre   | chr10 : 73601138 - 73601260  | 123bp | CAATCTCCACTTTAATCGTCACC (1185)      | TGGTATCTTGCCATTGTACTION (1186)      |
| 18 | Fig 1E, bottom right    | chr17 : 22897979 - 22898139  | 161bp | ACGGTTGTGAGCTTCATGC (1187)          | CTGATCCCCTGACATTCCTG (1188)         |
| 19 | Fig 2C, Cluster1 left   | chr2 : 145133621 - 145133710 | 90bp  | CGAGCTGGGCTTAAAATTCA (1871)         | GGCACCACGAAGAAAACATT (1872)         |
| 20 | Fig 2C, Cluster1 right  | chr5 : 32804652 - 32804742   | 91bp  | CGATGGGACAGTTATTTGG (1875)          | CCCTCTGGCATACTTCTTGC (1876)         |
| 21 | Fig 2C, Cluster2 left   | chr5 : 39461077 - 39461153   | 77bp  | GGGTGCAAATAAGGACAGGA (1531)         | ACGGATCTGTGAAACGAAGC (1532)         |
| 22 | Fig 2C, Cluster2 right  | chr1 : 29381316 - 29381406   | 91bp  | GAGCTGGAGCTTTGGAATCA (1851)         | AAAGGAGGGTCCGAGACATC (1852)         |
| 23 | Fig 2C, Cluster3 left   | chr1 : 194643811 - 194643938 | 128bp | GCCACTTGCCAATGTTTCTC (1355)         | TGGCCCCATGTAGTGAAAAG (1356)         |
| 24 | Fig 2C, Cluster3 right  | chr4 : 119906101 - 119906177 | 77bp  | TGGCAAAGATCTGGAAGTCAT (1841)        | GGCCATATTTGTCCAAGTGC (1842)         |
| 25 | Fig S2B, Cluster1       | chr16 : 84106170 - 84106251  | 82bp  | ATGCCTATGGATGTGTGTGC (1473)         | ACACTGGGAGCAGCAAGATT (1474)         |
| 26 | Fig S2B, Cluster2 left  | chr1 : 151784191 - 151784268 | 78bp  | TTTTTCCACCCCTCACTCAG (1337)         | GGAGGGAAAAGAATGGCAAG (1338)         |
| 27 | Fig S2B, Cluster2 right | chr3 : 14419070 - 14419144   | 75bp  | CCGAGCTGGTATTTTTCCAC (1509)         | ACCTCGCGTGTCTGTTGTCT (1510)         |

**Supplementary Table S3. Overlap between HIRA/UBN1/ASF1a and chromatin proteins characterized by the ENCODE project, Related to Figure 4A.**

| Protein       | % overlap with HIRA/UBN1/ASF1a |
|---------------|--------------------------------|
| TFAP2A        | 20                             |
| TFAP2C        | 25                             |
| <b>BAF155</b> | <b>57</b>                      |
| <b>BAF170</b> | <b>41</b>                      |
| <b>INI1</b>   | <b>41</b>                      |
| <b>BRG1</b>   | <b>36</b>                      |
| c-MYC         | 35                             |
| MAX           | 42                             |
| JUND          | 50                             |
| c-FOS         | 31                             |
| c-JUN         | 37                             |
| RNA POL II    | 27                             |
| E2F1          | 10                             |
| E2F4          | 6                              |
| E2F6          | 8                              |
| NRF1          | 12                             |
| RPC155        | 4                              |
| TFIIIC        | 8                              |
| BDP1          | 2                              |
| BRF1          | 1                              |
| BRF2          | 0                              |
| TR4           | 2                              |
| p300          | 68                             |
